# Supplementary material for: High-Resolution 18F-FDG PET/CT for Assessing Three-Dimensional Intraoperative Margins Status in Malignancies of the Head and Neck, a Proof-of-Concept
Source: MDPI journal article supplement (doi:10.3390/jcm10163737), 2021-08-22
Supplement: s1 [file s1]

**Supplementary Material 1. PET/CT-imaging of the surgical specimens**

| Specimen number                                                   | White light picture of the resected specimen                                        | PET/CT-image of the resected specimen                                                |
|-------------------------------------------------------------------|-------------------------------------------------------------------------------------|--------------------------------------------------------------------------------------|
| 1                                                                 | 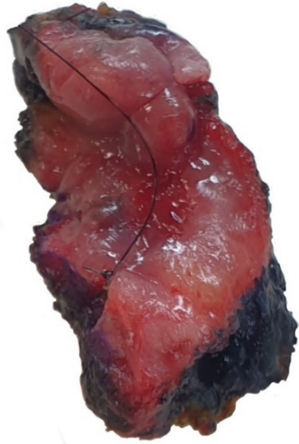   |    |
| Patient 1: Mucosal squamous cell carcinoma of the floor of mouth. |                                                                                     |                                                                                      |
| 2                                                                 |   |   |
| Patient 2: Mucosal squamous cell carcinoma of the tongue.         |                                                                                     |                                                                                      |
| 3                                                                 |  |  |
| Patient 3: Cutaneous squamous cell carcinoma of the scalp.        |                                                                                     |                                                                                      |

4

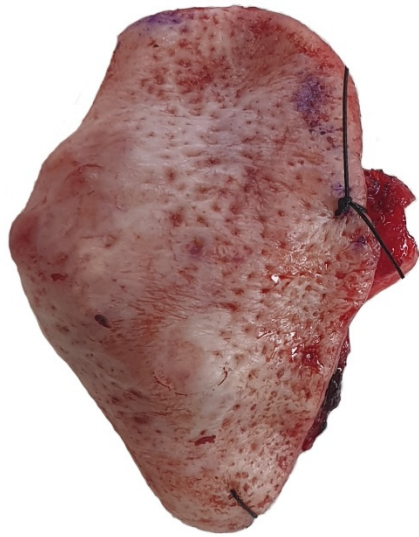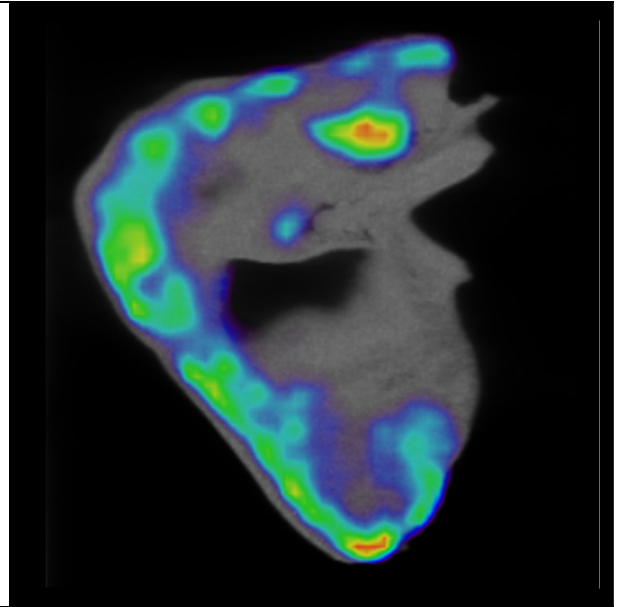

Patient 4: Angiosarcoma of the nasal tip.

5

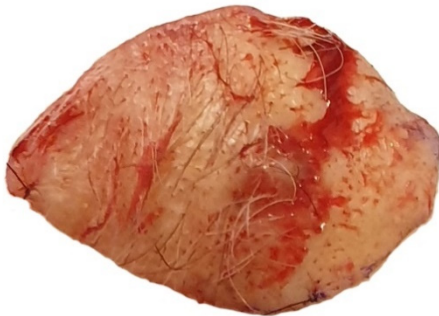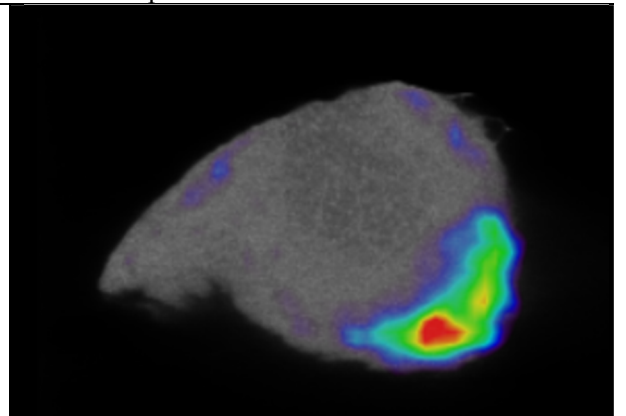

Patient 5: Cutaneous preauricular squamous cell carcinoma.

6

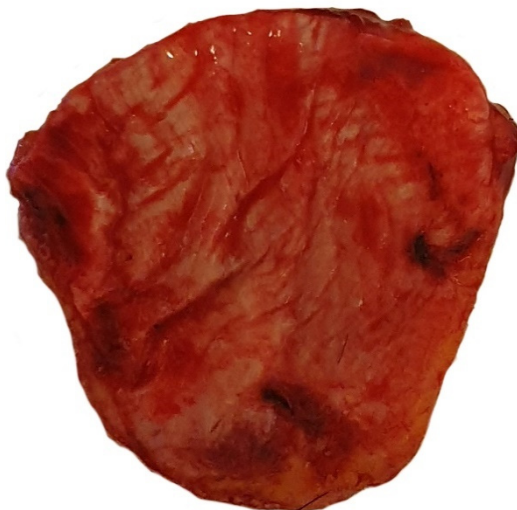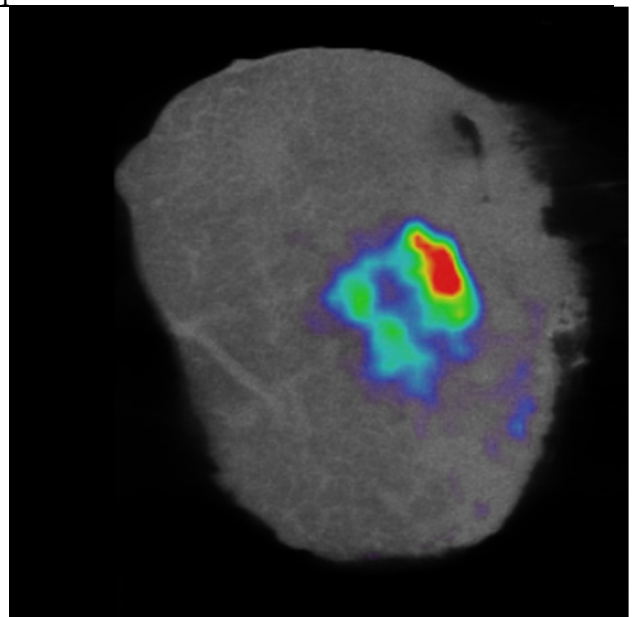

Patient 5: Cutaneous squamous cell carcinoma located on the scalp.

7

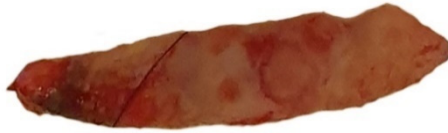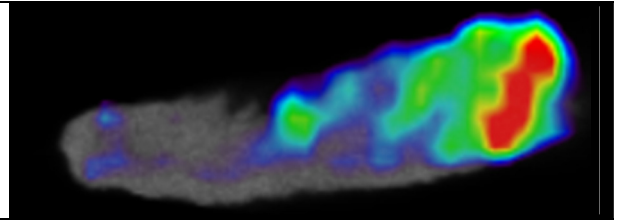

Patient 5: Cutaneous preauricular basocellular carcinoma .

8

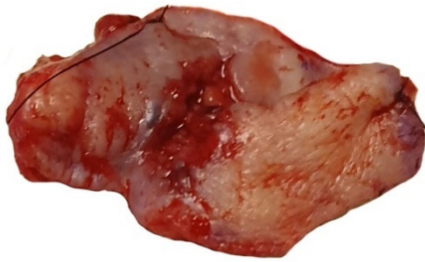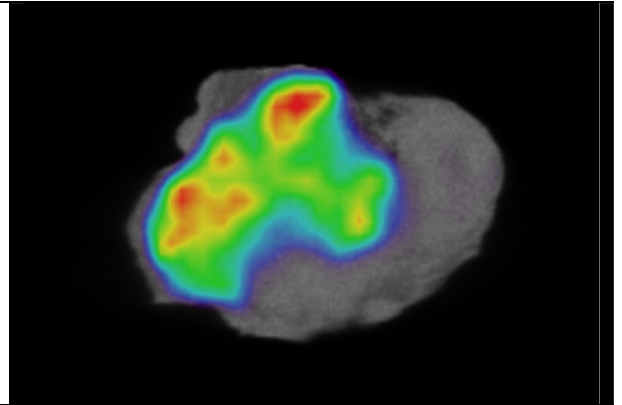

Patient 6: Cutaneous squamous cell carcinoma located on the external ear

9

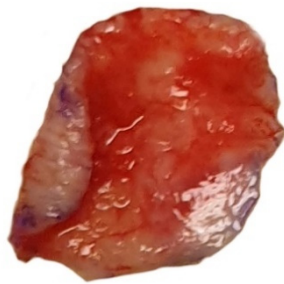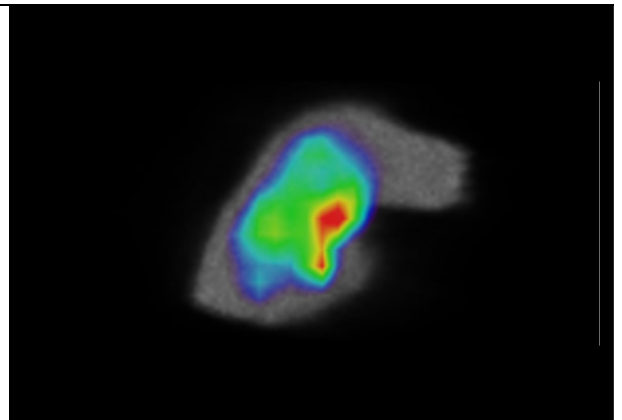

Patient 6: Cutaneous preauricular squamous cell carcinoma.

10

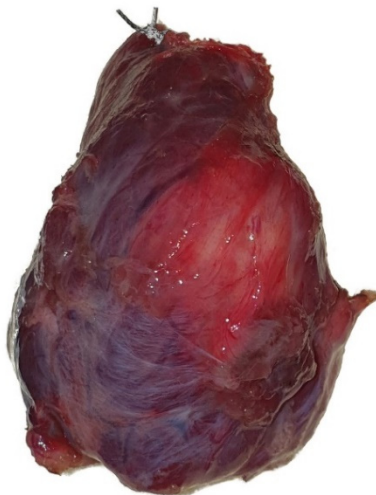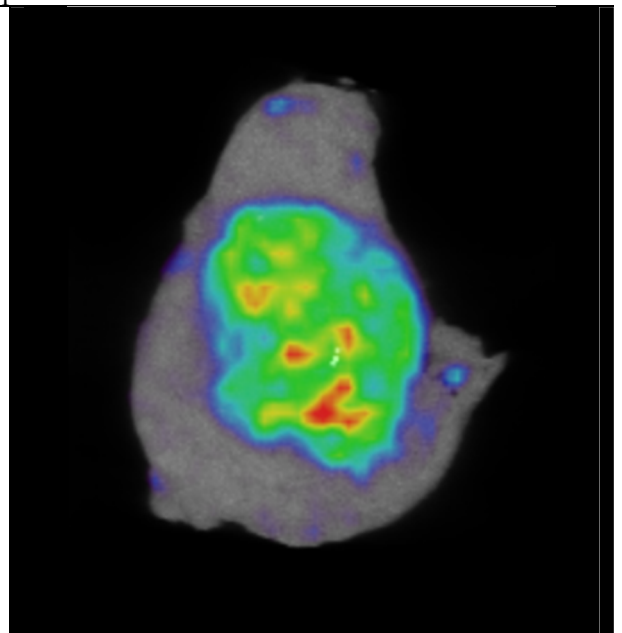

Patient 7: Medullary thyroid carcinoma.

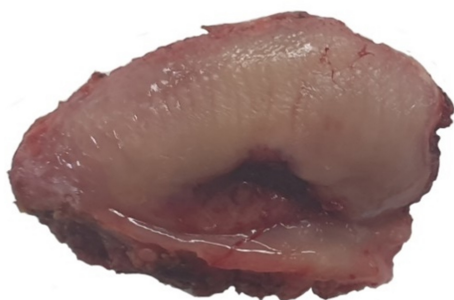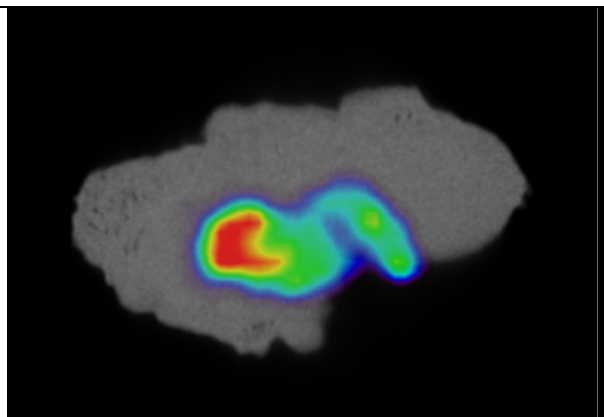

Patient 8: Mucosal Squamous cell carcinoma of the tongue.

**Supplementary Material 2:** 3D video render of the PET/CT-imaging of specimen 2**Supplementary Material 3.** Simulation of PET-acquisition with lower administered  $^{18}\text{F}$ -FDG and shorter scanning protocol

For this study, patients were injected with approximately 4MBq/kg of  $^{18}\text{F}$ -FDG. The standard PET-acquisition time of the surgical specimens was always kept on 30 minutes for every scan. In order to simulate PET-scans with a lower acquisition time and a lower administered activity, a shorter time frame of only the first few minutes of the original PET acquisition was reconstructed. To simulate an administered dose of 1MBq/kg, using an acquisition time of 30 minutes, a time frame of 7.5 minutes was reconstructed. A time frame of 5 minutes was reconstructed to simulate a lower acquisition time of 5 minutes using a dose of 4MBq/kg. To simulate PET data using 1/4th of the activity and acquired during 5 minutes, a time frame of 1.25 minutes was reconstructed from the original 30 minutes PET-scan. The length of the time frames used during reconstruction are summarized in Table S1. For each tumoral specimen, a snapshot was taken with the different image reconstructions. The reconstructed images are provided in Figures S1–S11.

**Table S1.** Length of the reconstructed time frame used to simulate the decreased activity and acquisition time.

| Simulated activity               | Simulated acquisition time | Length time frame during reconstruction |
|----------------------------------|----------------------------|-----------------------------------------|
| Baseline (4MBq/kg)               | 30 minutes                 | 30 minutes                              |
| $\frac{1}{4}$ activity (1MBq/kg) | 30 minutes                 | 7.5 minutes                             |
| Baseline (4MBq/kg)               | 5 minutes                  | 5 minutes                               |
| $\frac{1}{4}$ activity (1MBq/kg) | 5 minutes                  | 1.25 minutes                            |

Baseline activity

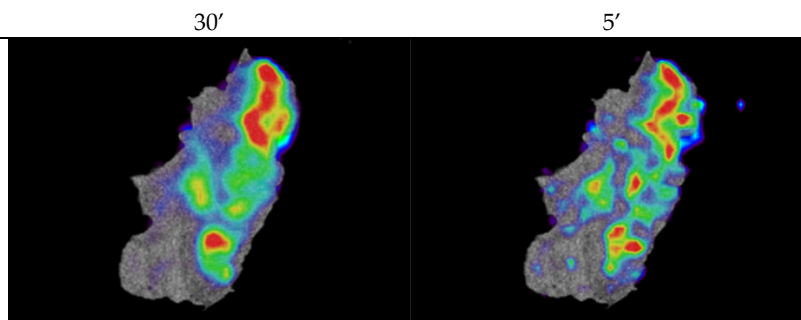

1/4<sup>th</sup> administered activity

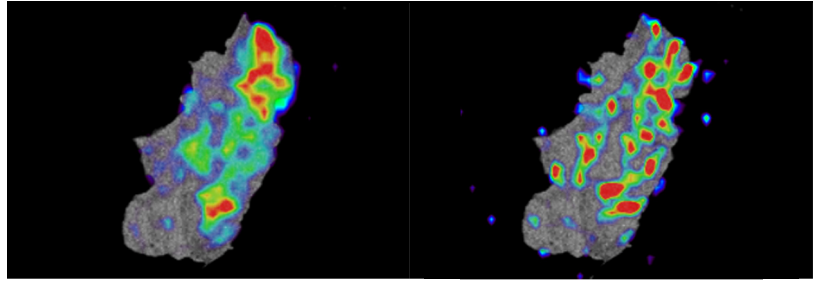

**Figure S1.** Original (top left) and simulated PET scans for specimen 1.



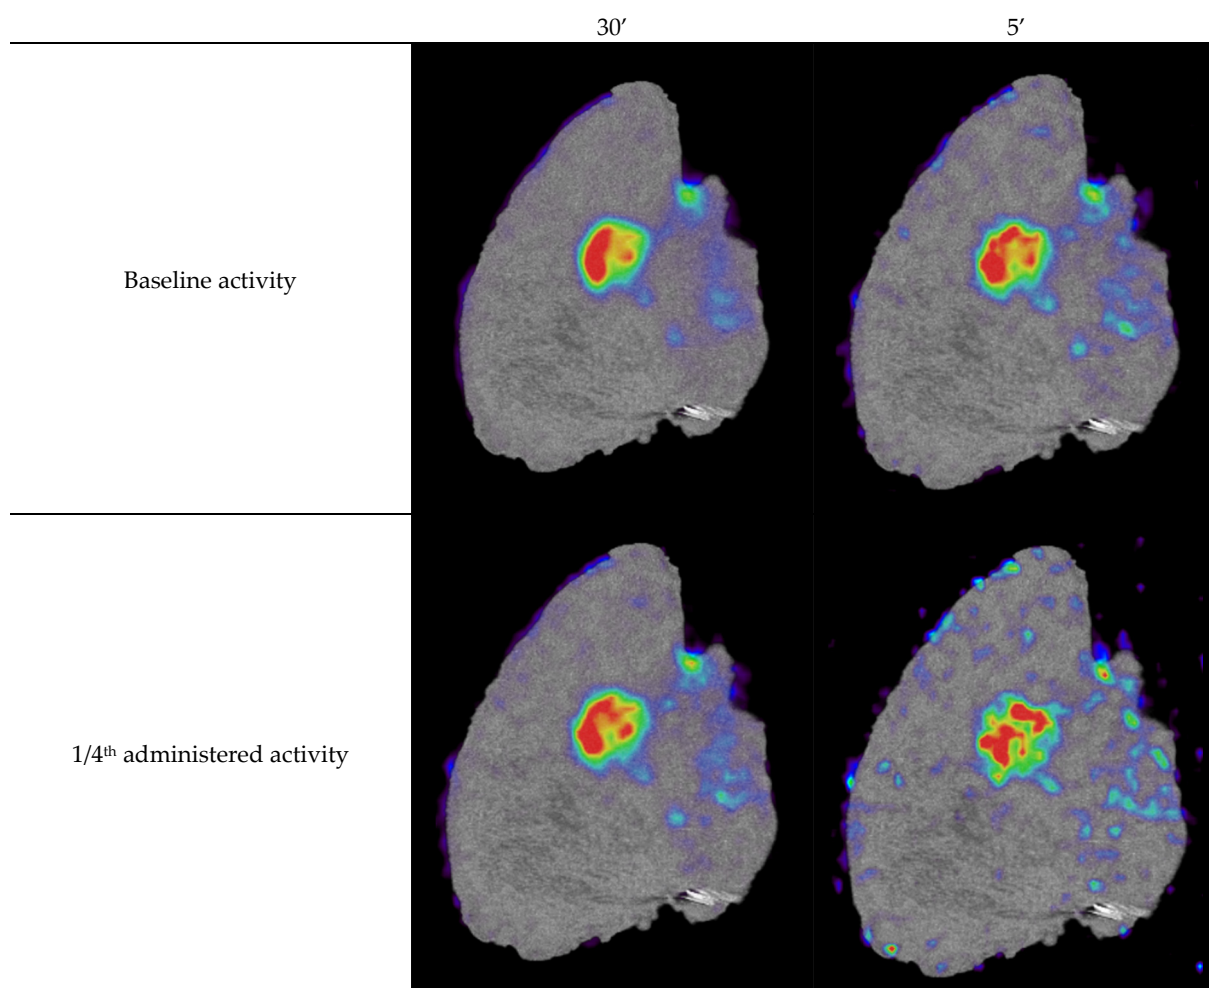

**Figure S2.** Original (top left) and simulated PET scans for specimen 2.

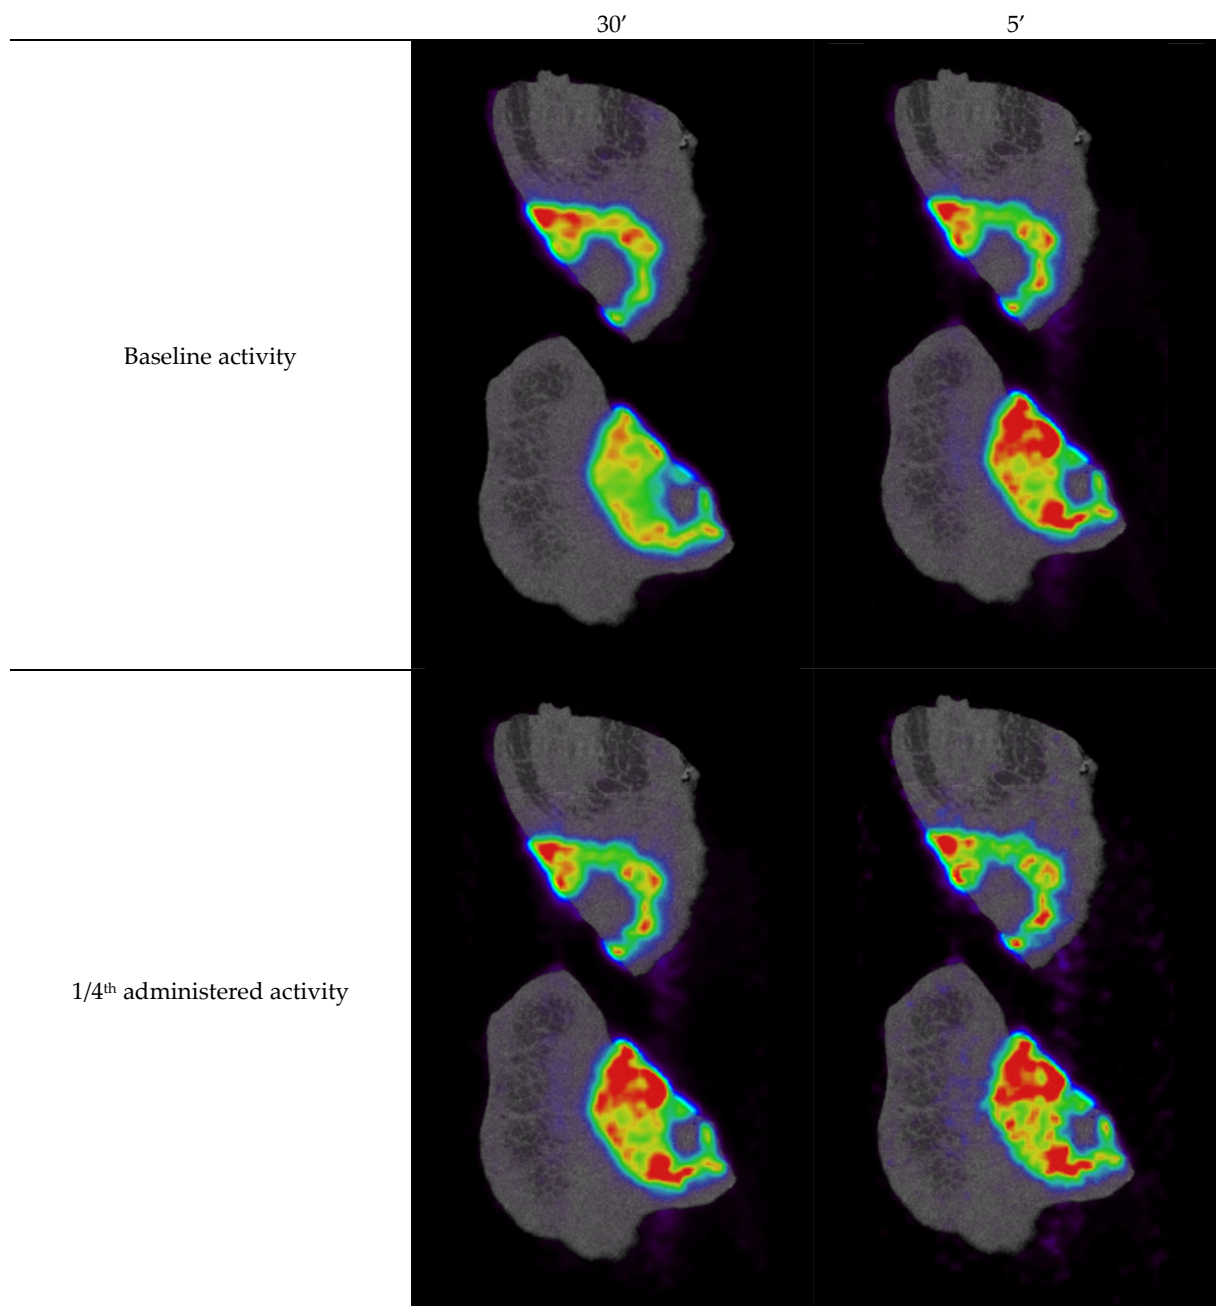

**Figure S3.** Original (top left) and simulated PET scans for specimen 3.

|  | 30' | 5' |
|--|-----|----|
|--|-----|----|

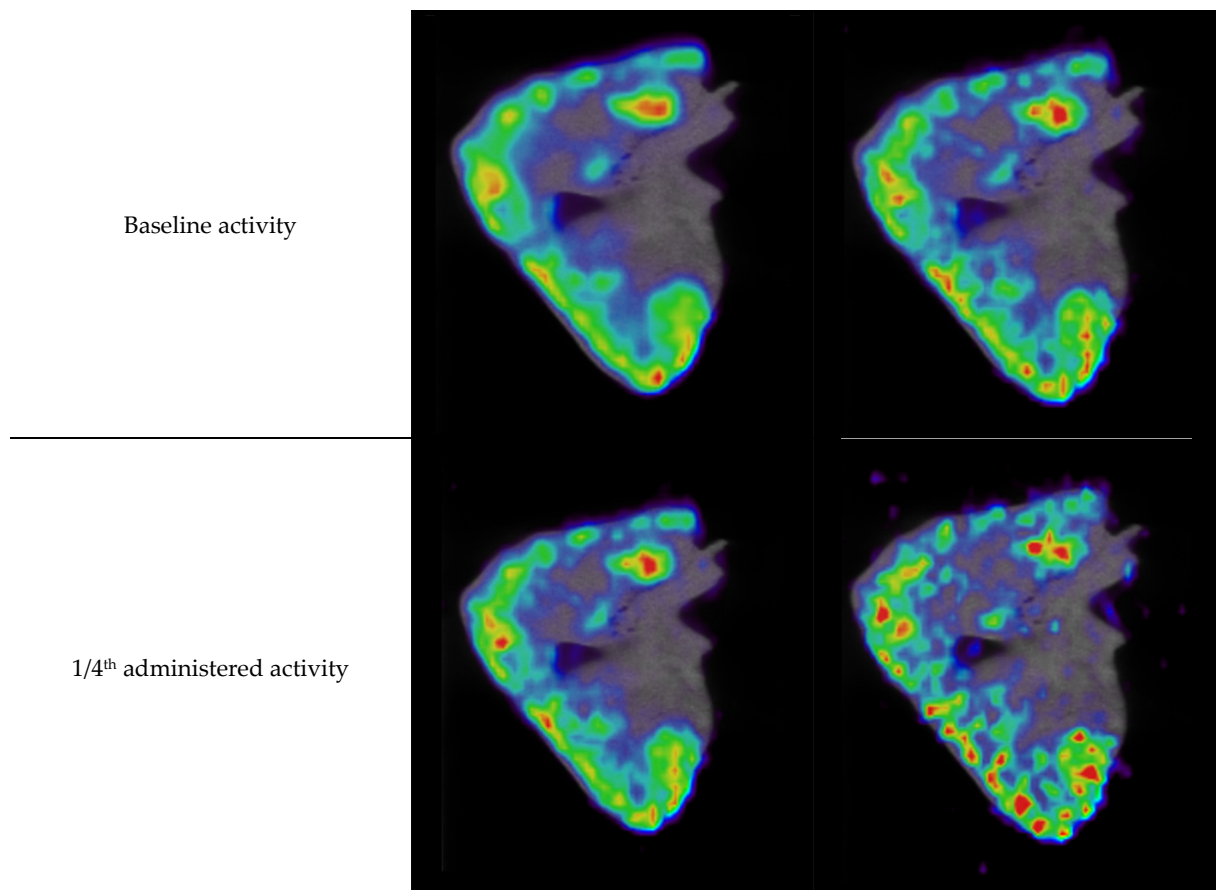

**Figure S4.** Original (top left) and simulated PET scans for specimen 4.

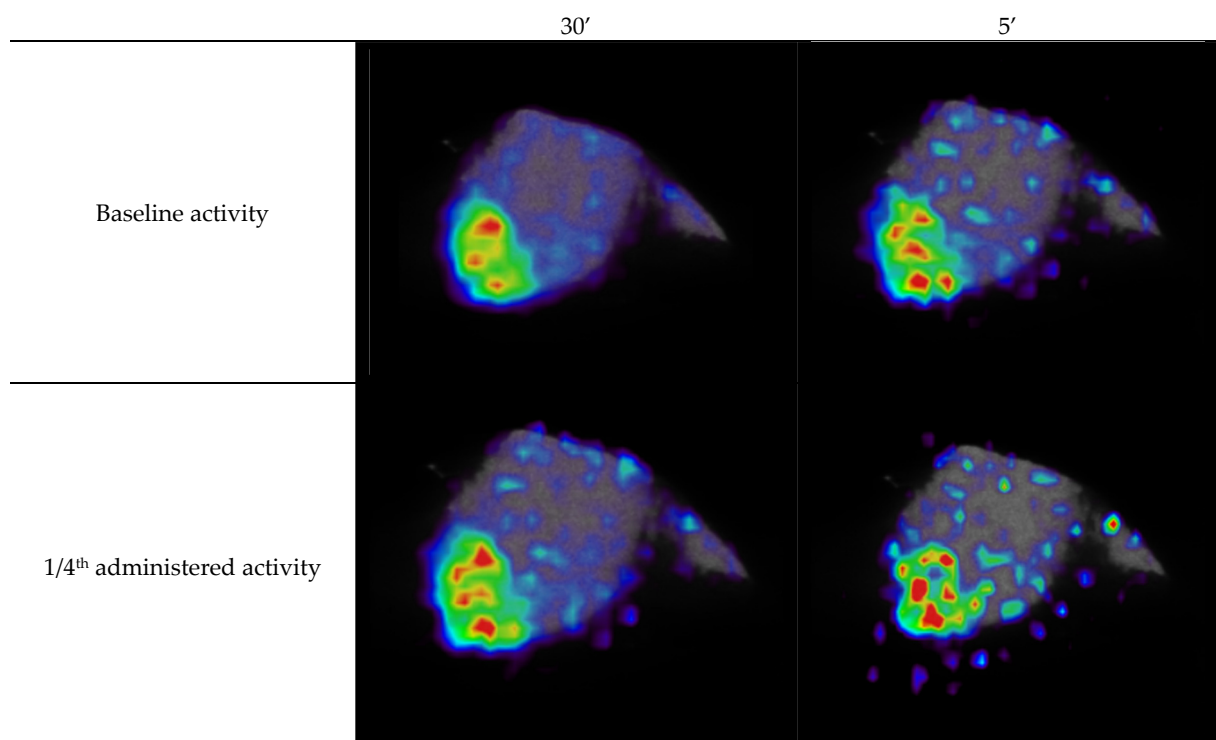

**Figure S5.** Original (top left) and simulated PET scans for specimen 5.



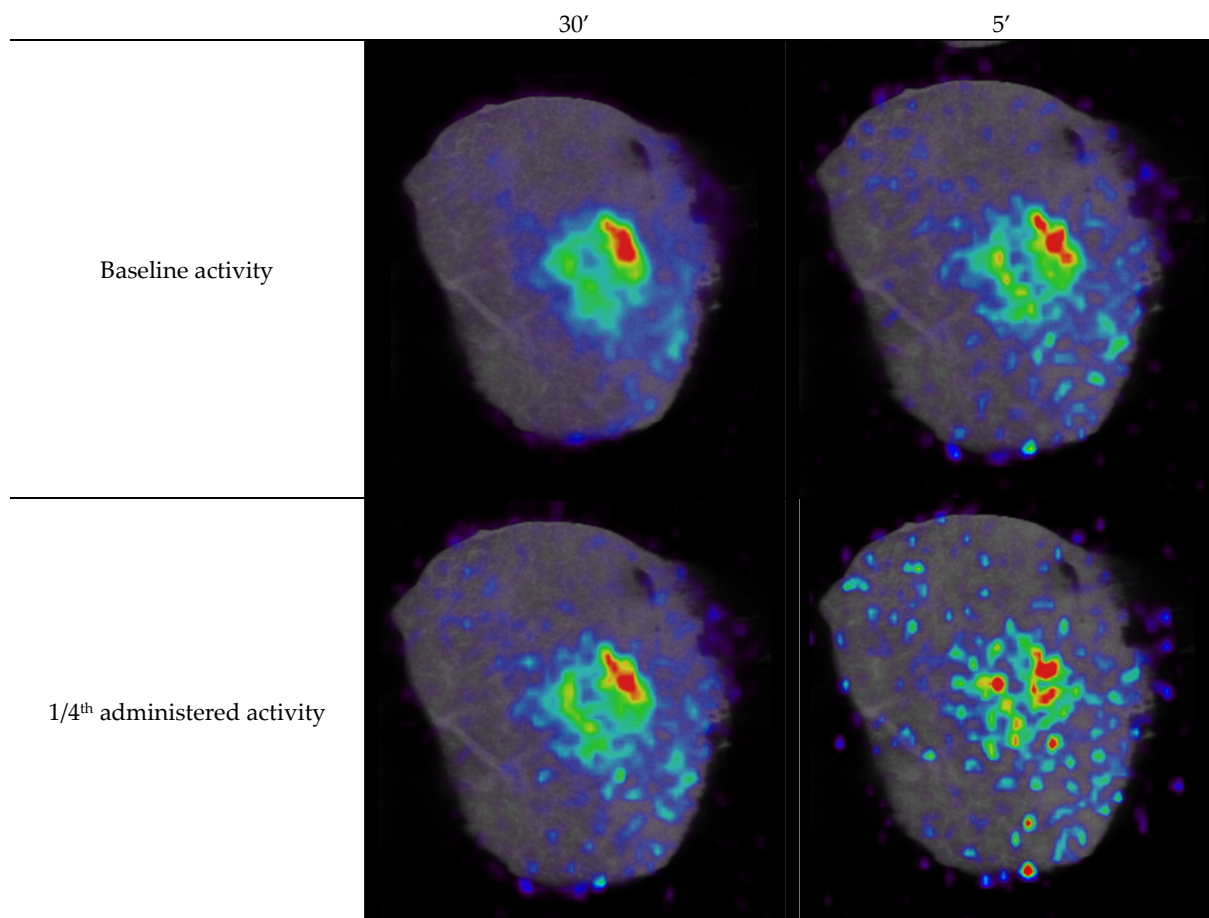

**Figure S6.** Original (top left) and simulated PET scans for specimen 6.

#### Specimen 7

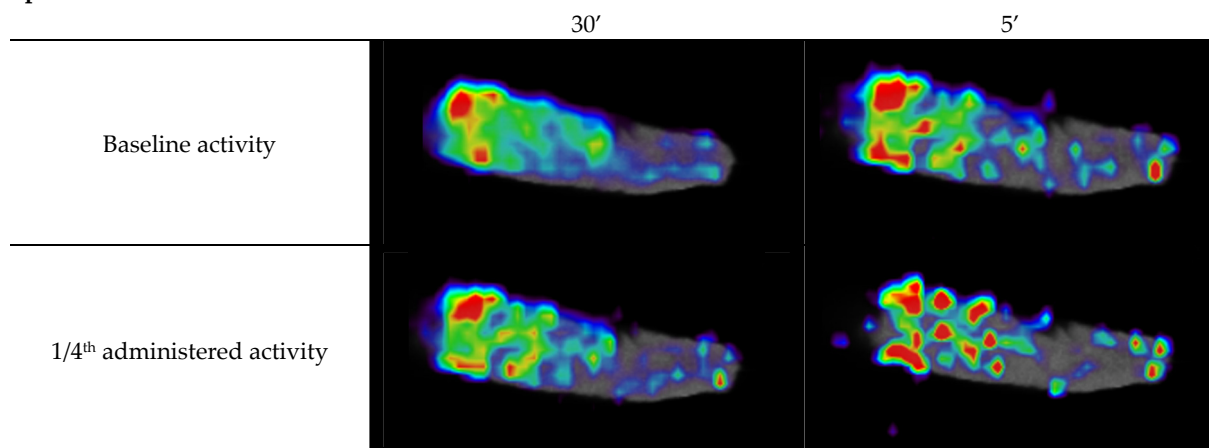

**Figure S7.** Original (top left) and simulated PET scans for specimen 7.

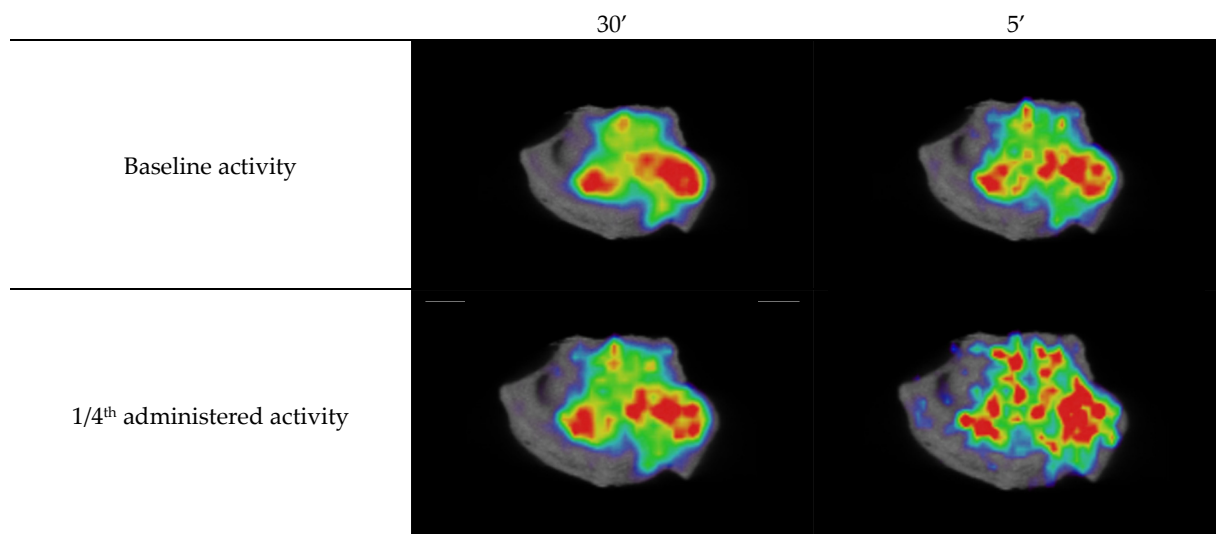

**Figure S8.** Original (top left) and simulated PET scans for specimen 8.

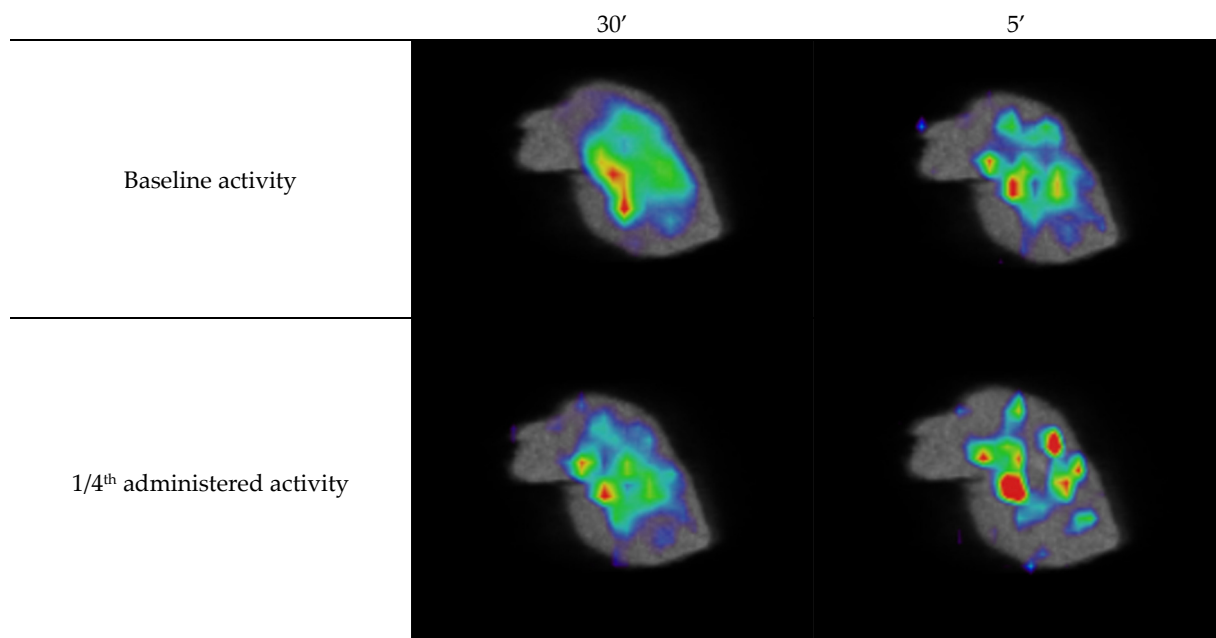

**Figure S9.** Original (top left) and simulated PET scans for specimen 9.

Specimen 10

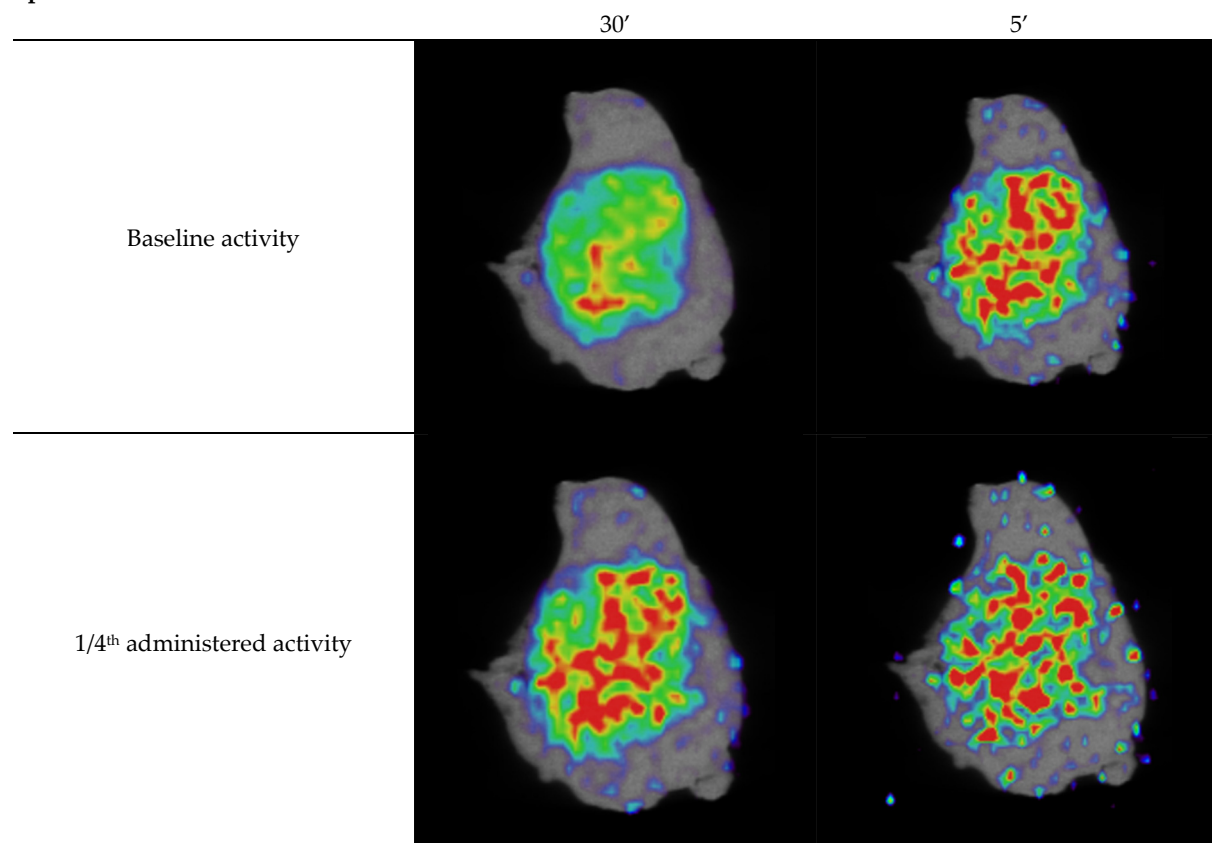

**Figure S10.** Original (top left) and simulated PET scans for specimen 10.

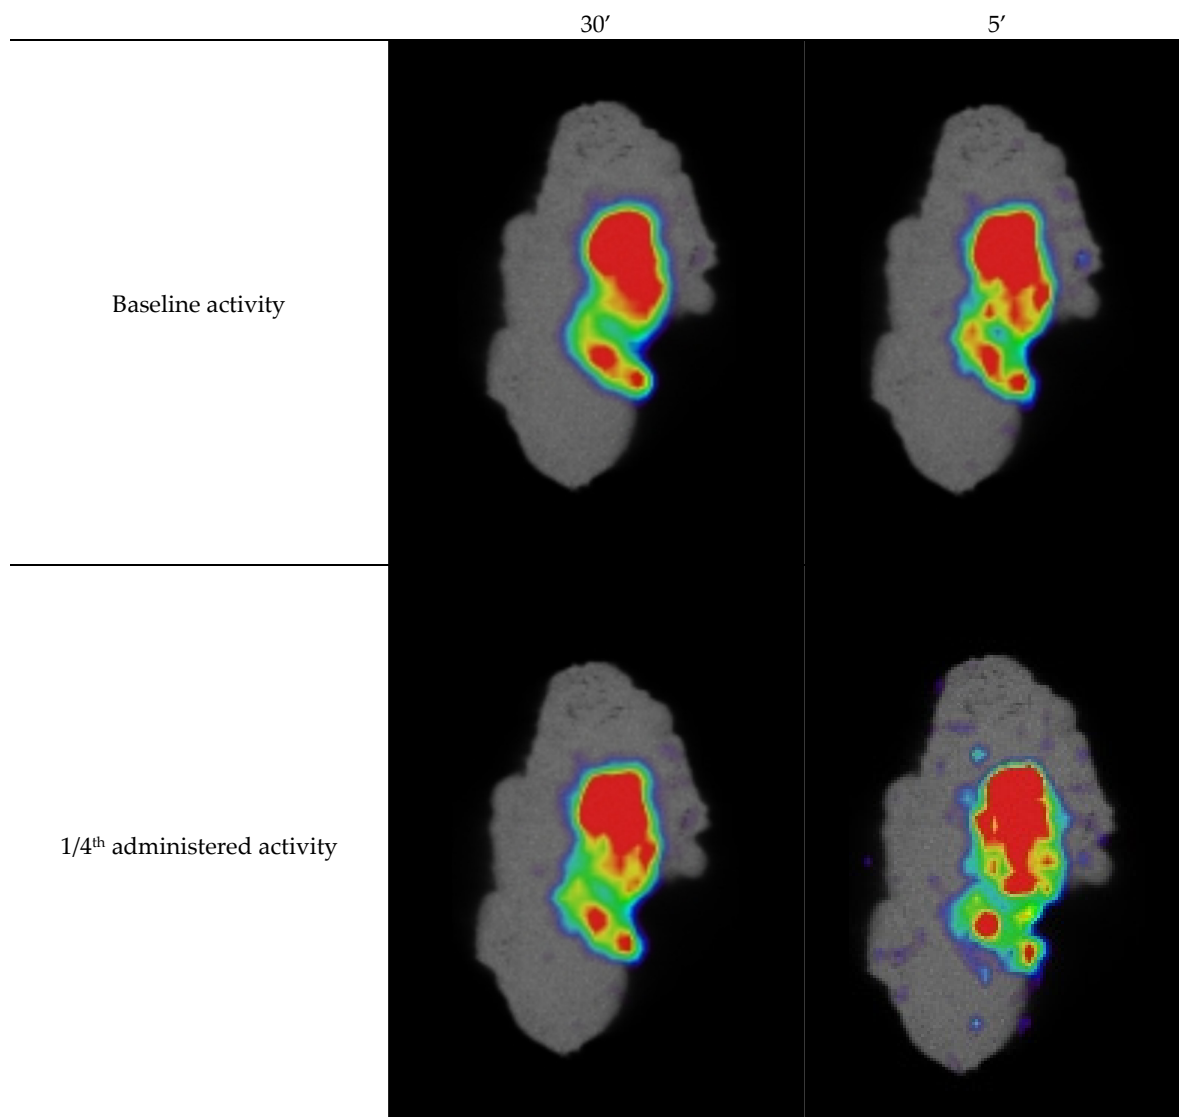

**Figure S11.** Original (top left) and simulated PET scans for specimen 11.
